# Supplementary material for: Determination of phenol degradation in chloride ion rich water by ferrate using a chromatographic method in combination with on-line mass spectrometry analysis
Source: Royal Society of Chemistry journal article supplement (doi:10.1039/c9ay01527b), 2019-01-01
Supplement: c9ay01527b1.pdf [file c9ay01527b1.pdf]

## Supplementary data

for

# Determination of phenol degradation in chloride ion rich water by ferrate using chromatographic method in combination with on-line mass spectrometry analysis

Debo Wu<sup>1,2</sup>, Yihan Xiong<sup>2</sup>, Minghe He<sup>3</sup>, Shuiping Yang<sup>1\*</sup>, Jialing Cai<sup>1</sup>, Zhangxiong Wu<sup>2</sup>,  
Shengpeng Sun<sup>2</sup>, Xiaodong Chen<sup>2</sup> and Winston Duo Wu<sup>2\*</sup>

<sup>1</sup>*Jiangxi Key Laboratory for Mass Spectrometry and Instrumentation, East China University of Technology, Nanchang 330013, P. R. China*

<sup>2</sup>*Suzhou Key Laboratory of Green Chemical Engineering, School of Chemical and Environmental Engineering, College of Chemistry, Chemical Engineering and Materials Science, Soochow University, Suzhou, Jiangsu, 215123, P.R. China*

<sup>3</sup>*Koovine Environmental Protection Technology, Kunshan, Suzhou, Jiangsu, 215300, P.R. China*

**\* Corresponding author**

**Winston Duo Wu**

Email: duo.wu@suda.edu.cn

Phone: 86-512-6588-2762,

Fax: 86-512-6588-2750

**Shuiping Yang**

Email: wxipysp@163.com

Phone: 86-791-8389-6370,

Fax: 86-791-8389-6370

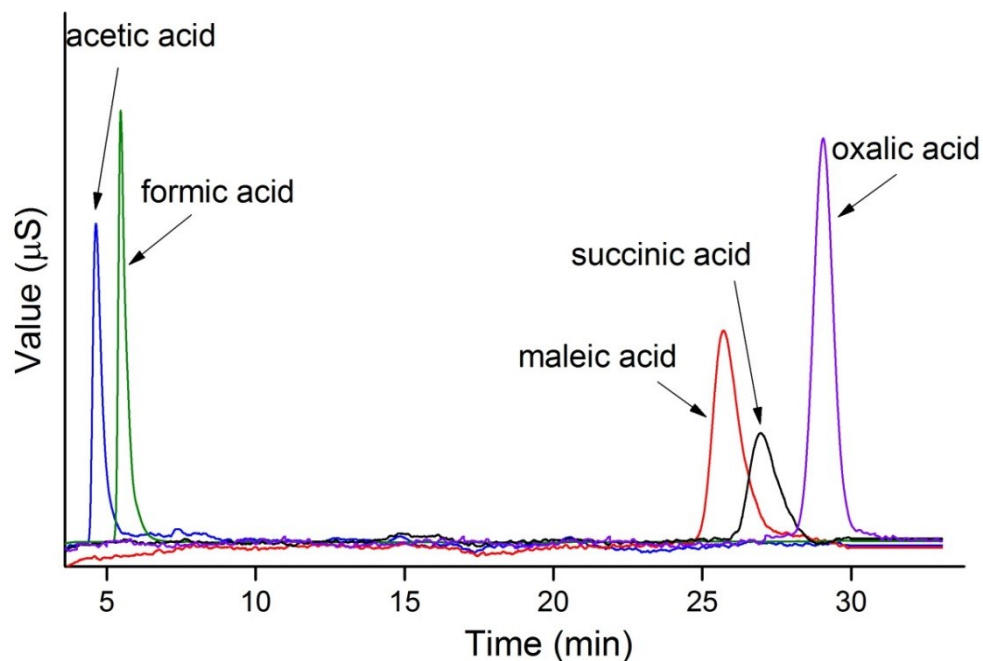

**Fig. S1** Integrated IC chromatograms of standards of possible organic byproducts formed during phenol degradation by Fe(VI). Standard concentration: 1 ppm of formic acid and oxalic acid, and 10 ppm of acetic acid, maleic acid and succinic acid.

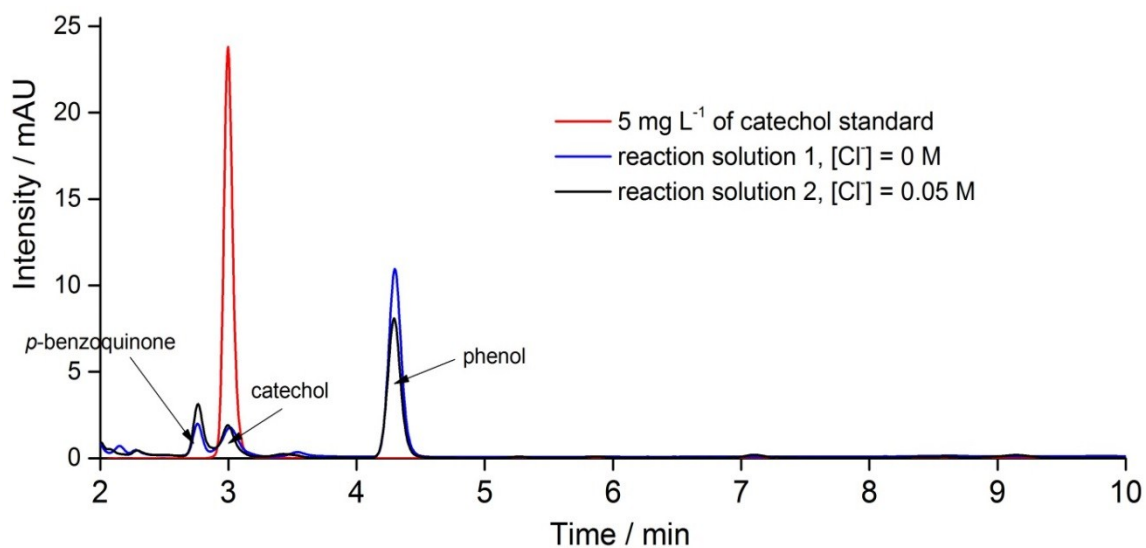

**Fig. S2** HPLC chromatograms of catechol with comparison to 5 mg L<sup>-1</sup> standard during phenol degradation by Fe(VI). Experimental conditions: [phenol] = 0.1 mM, [Fe(VI)] = 0.5 mM, pH = 6.5.

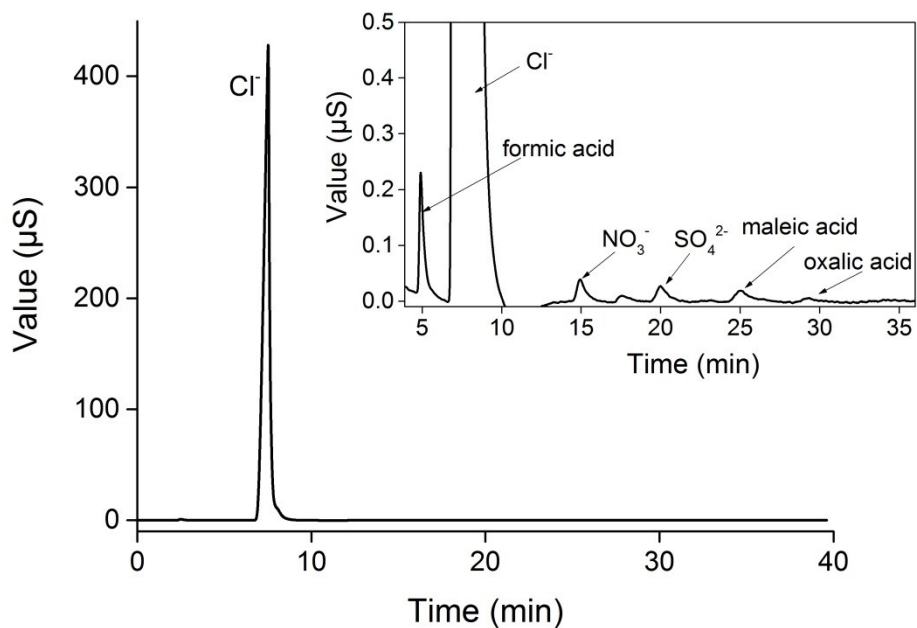

**Fig. S3** IC chromatograms of various intermediates after phenol degradation by Fe(VI). Experimental conditions: [phenol] = 0.1 mM,  $[\text{Cl}^-]_0 = 0.05$  M,  $[\text{Fe(VI)}] = 0.5$  mM, reaction time = 45 min, pH = 9.

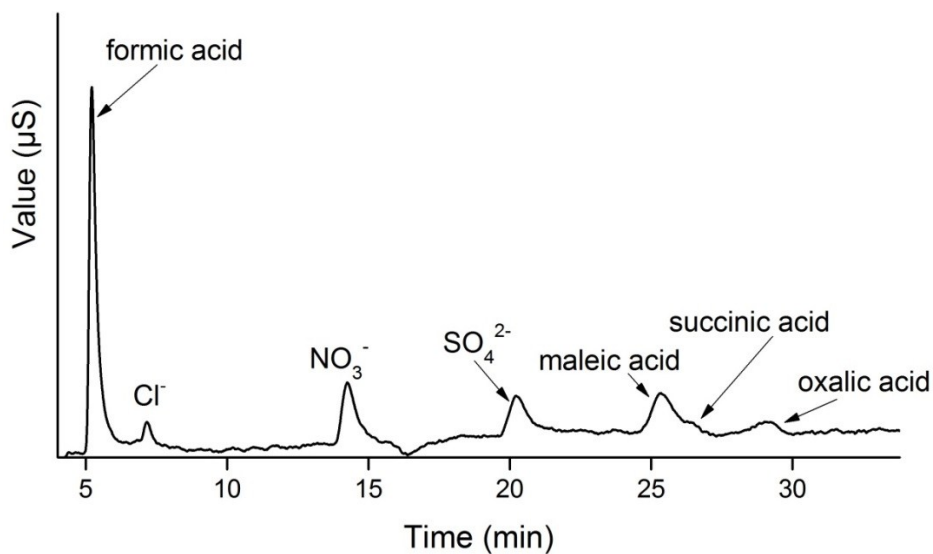

**Fig. S4** IC chromatograms of various intermediates after phenol degradation by Fe(VI). Experimental conditions: [phenol] = 0.1 mM,  $[\text{Cl}^-] = 0$  M,  $[\text{Fe(VI)}] = 0.5$  mM, reaction time = 45 min, pH = 9.

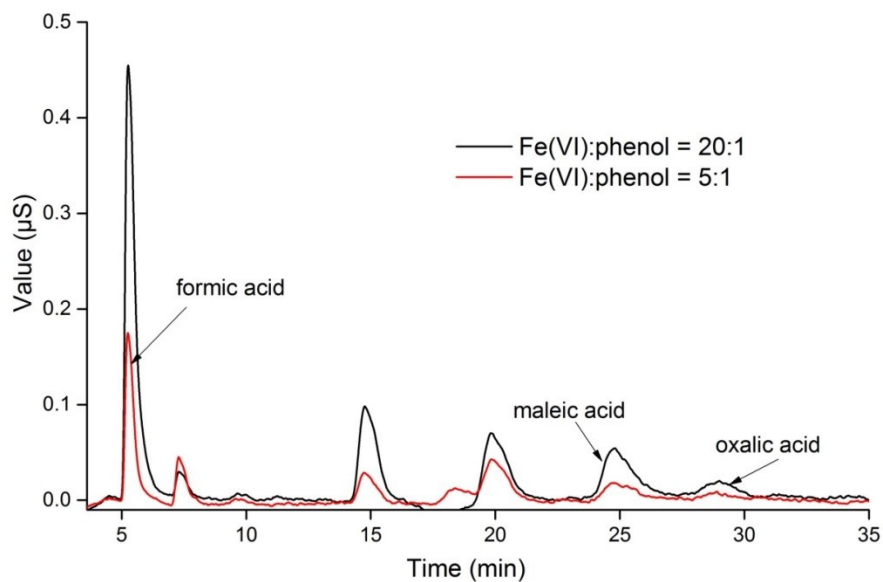

**Fig. S5** IC chromatograms of various intermediates with different Fe(VI) dosage after phenol degradation by Fe(VI). Experimental conditions: [phenol] = 0.1 mM, [Cl<sup>-</sup>] = 0 M, reaction time = 45 min, pH = 9.

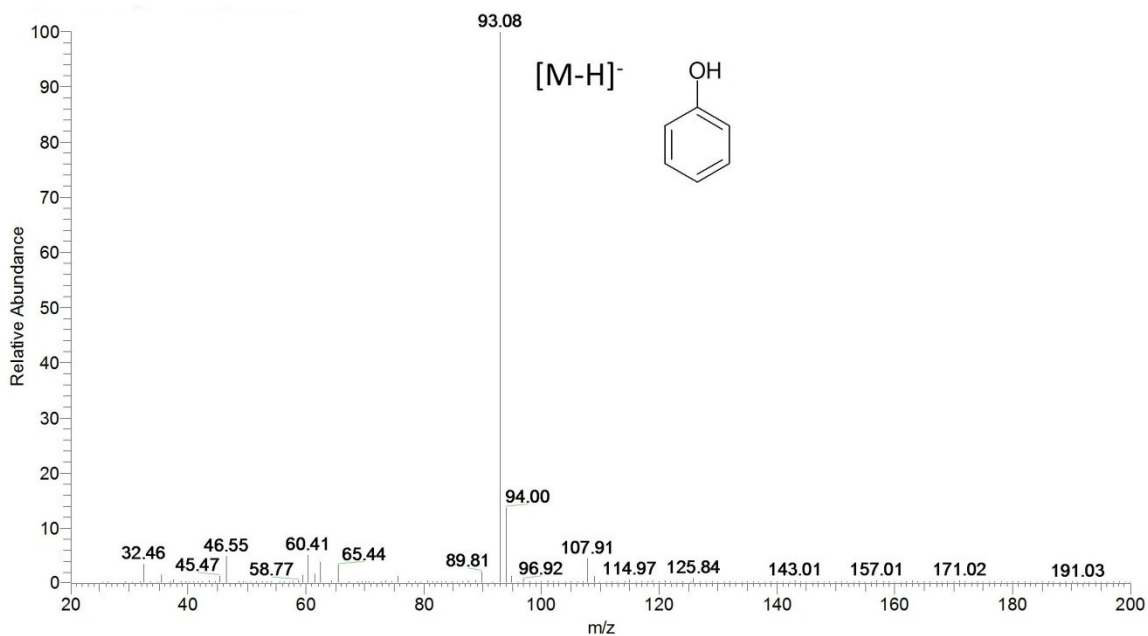

**Fig. S6.** MS spectrum of phenol ( $m/z = 93$ ) obtained from online EESI-MS analysis before addition of Fe(VI)

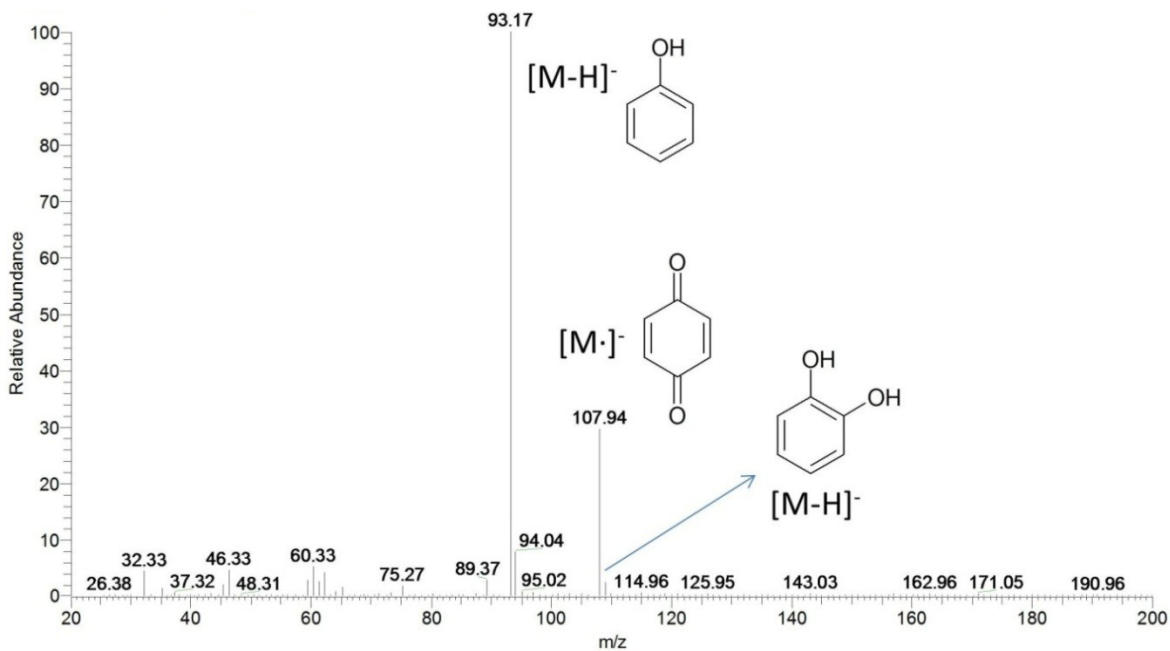

**Fig. S7.** MS spectrum of phenol ( $m/z = 93$ ) obtained from online EESI-MS analysis at  $t=1.5$  min after addition of Fe(VI)

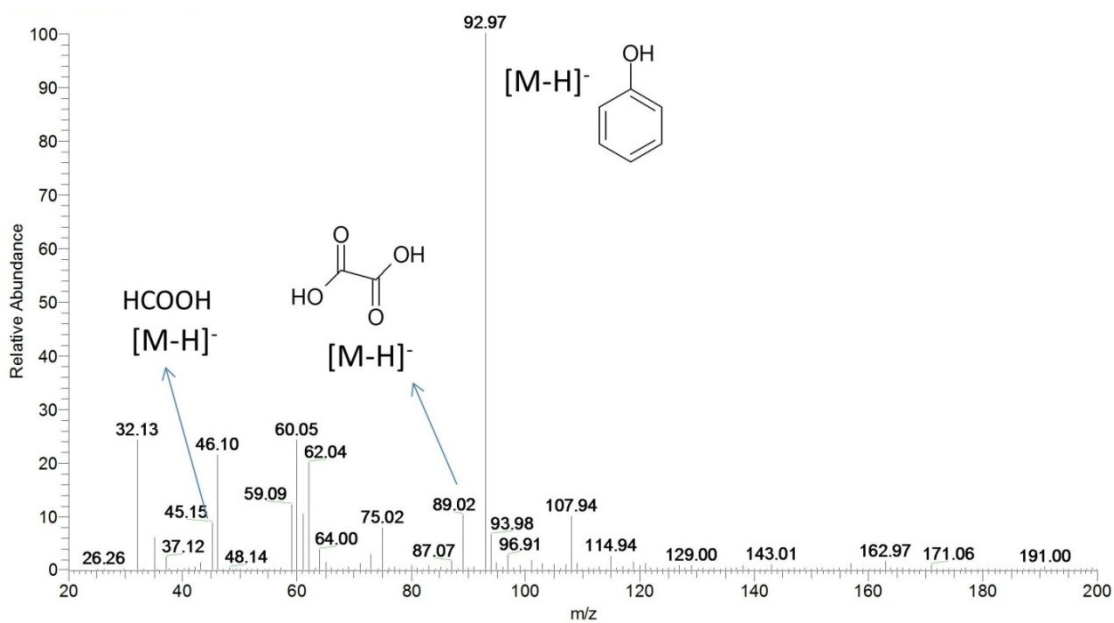

**Fig. S8.** MS spectrum of phenol ( $m/z = 93$ ) obtained from online EESI-MS analysis at  $t=5$  min after addition of Fe(VI)

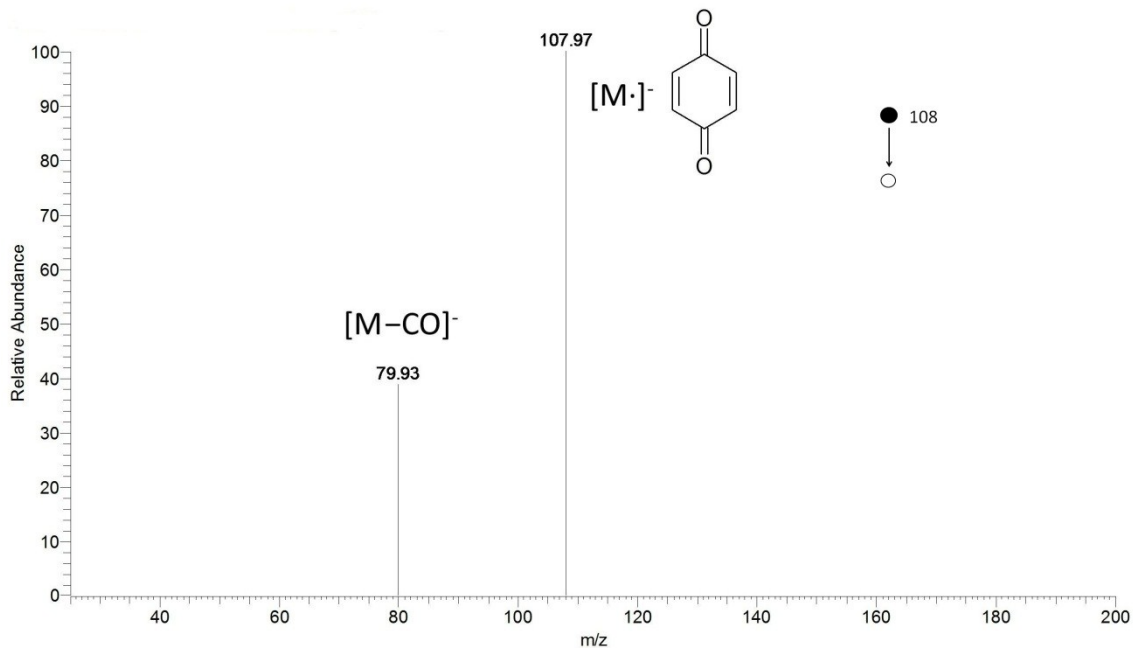

**Fig. S9.** MS<sup>2</sup> spectrum of *p*-benzoquinone (m/z = 108) obtained from online EESI-MS analysis. The m/z at 108.0 yielded the characteristic fragment of m/z at 80 by losing CO.

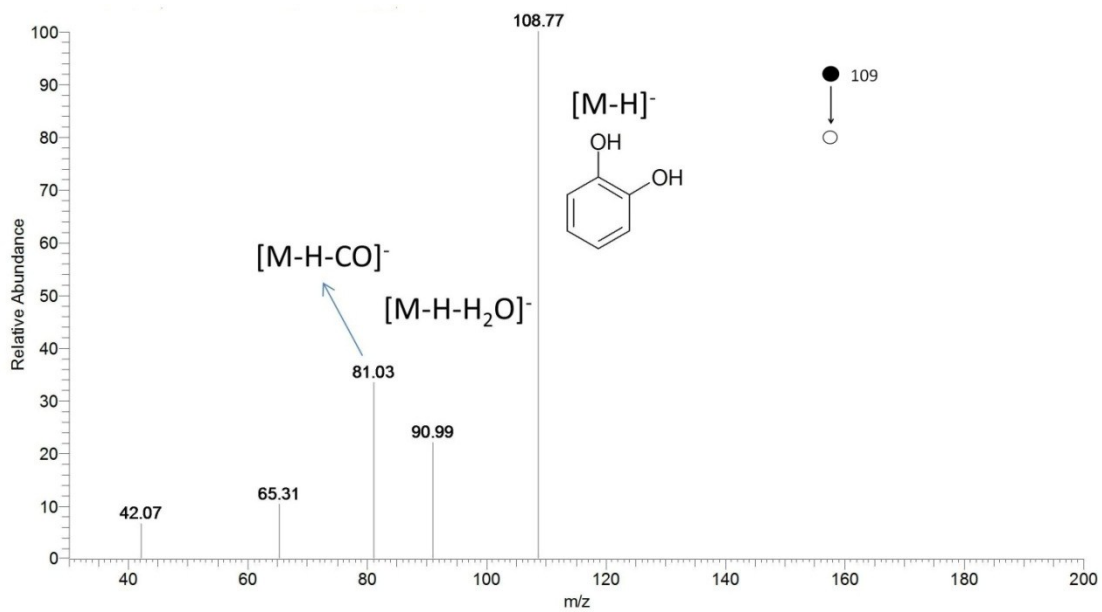

**Fig. S10.** MS<sup>2</sup> spectrum of catechol (m/z = 109.0) obtained from online EESI-MS analysis. The m/z at 109.0 yielded the characteristic fragment of m/z at 81 and 91 by losing CO and H<sub>2</sub>O respectively.
